# Supplementary material for: Influences of sodium dodecyl sulfate on vulcanization kinetics and mechanical performance of EPDM/graphene oxide nanocomposites
Source: Royal Society of Chemistry journal article supplement (doi:10.1039/c5ra00394f), 2015-01-01
Supplement: c5ra00394f1.pdf [file c5ra00394f1.pdf]

## Supporting information

### Influences of sodium dodecyl sulfate on vulcanization behavior and mechanical performance of EPDM/graphene oxide nanocomposites

Ahmad Allahbakhsh <sup>1,\*</sup>, Saeedeh Mazinani <sup>2</sup>

<sup>1</sup> *Young Researchers and Elite Club, Shiraz Branch, Islamic Azad University, Shiraz, Iran.*

<sup>2</sup> *Amirkabir Nanotechnology Research Institute (ANTRI), Amirkabir University of Technology, Tehran, Iran.*

\*Corresponding Author: [ahmad.allahbakhsh@gmail.com](mailto:ahmad.allahbakhsh@gmail.com), [a.allahbakhsh@modares.ac.ir](mailto:a.allahbakhsh@modares.ac.ir)

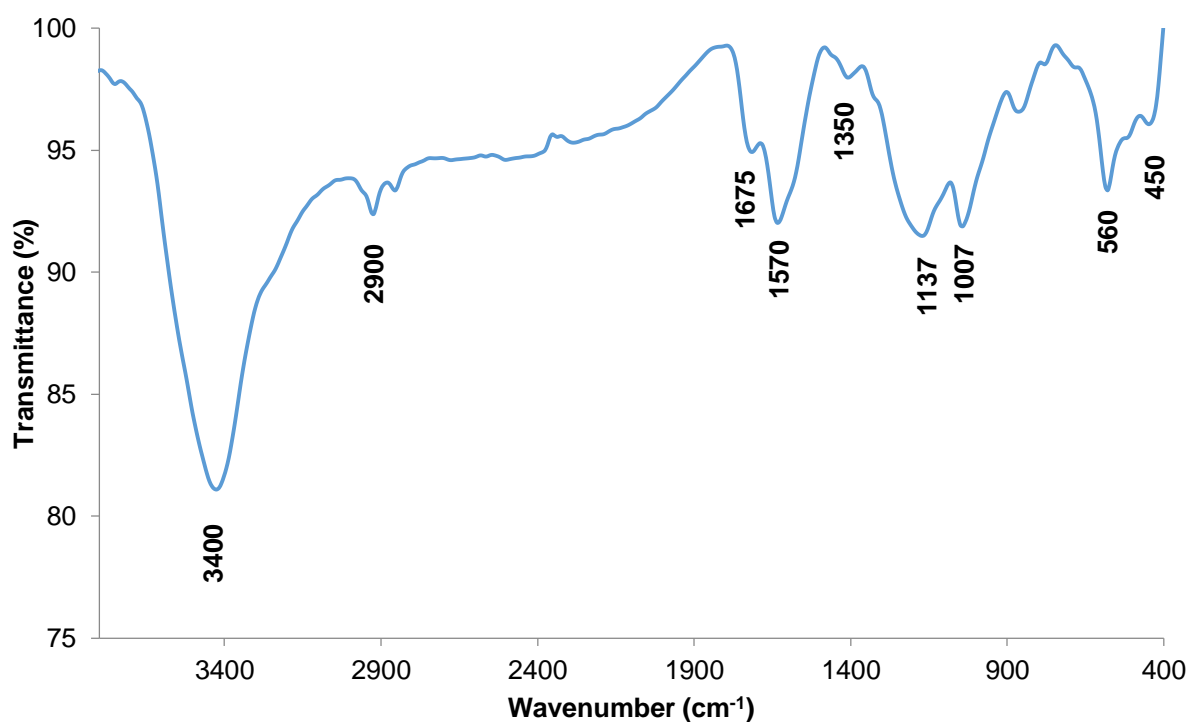

**Figure S1** FTIR spectrum of GO nanosheets

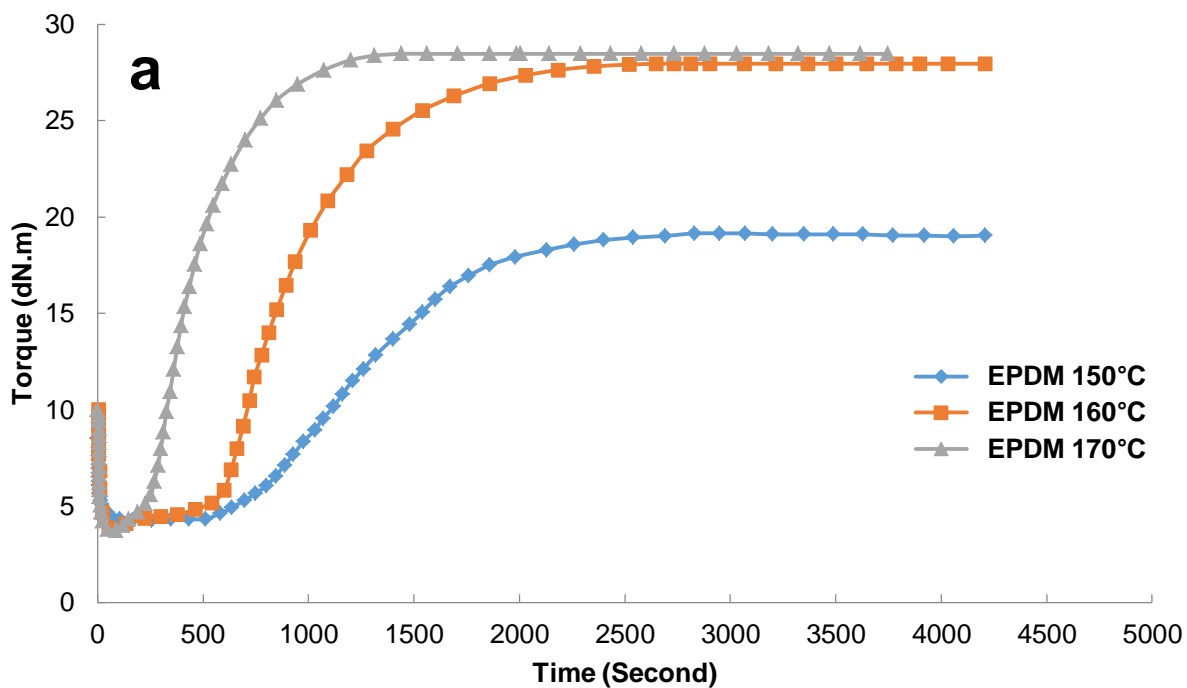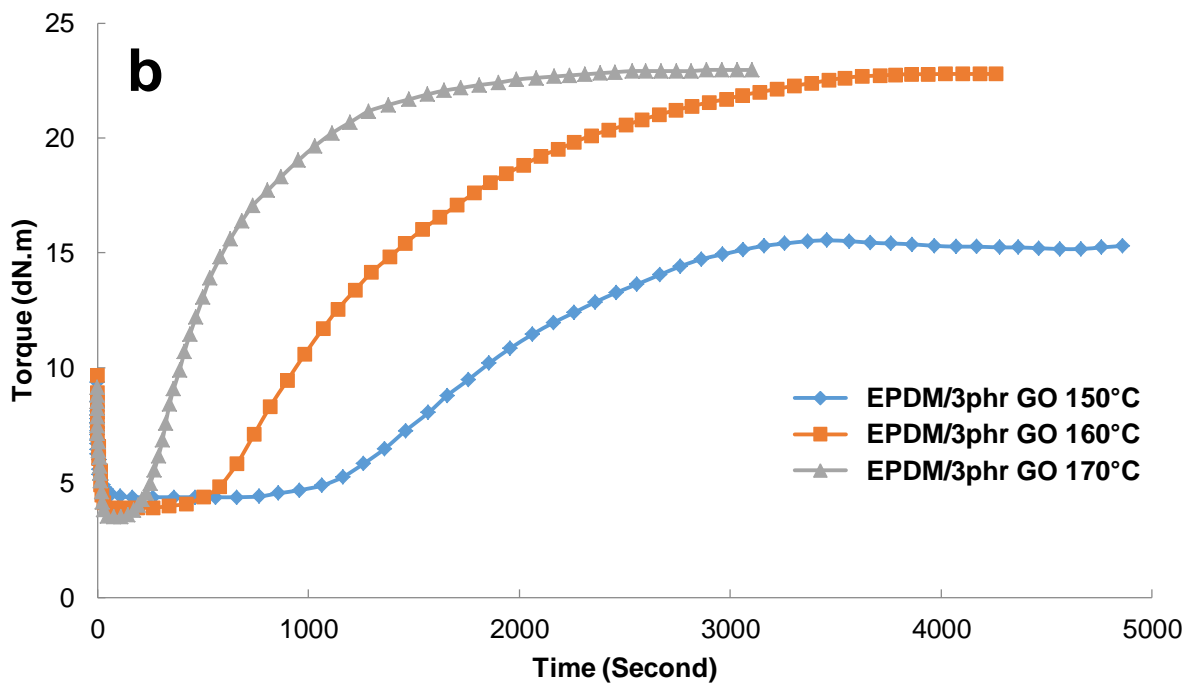

**Figure S2** Torque vs. time curves of EPDM (a) and EPDM/3phr GO nanocomposite (b)

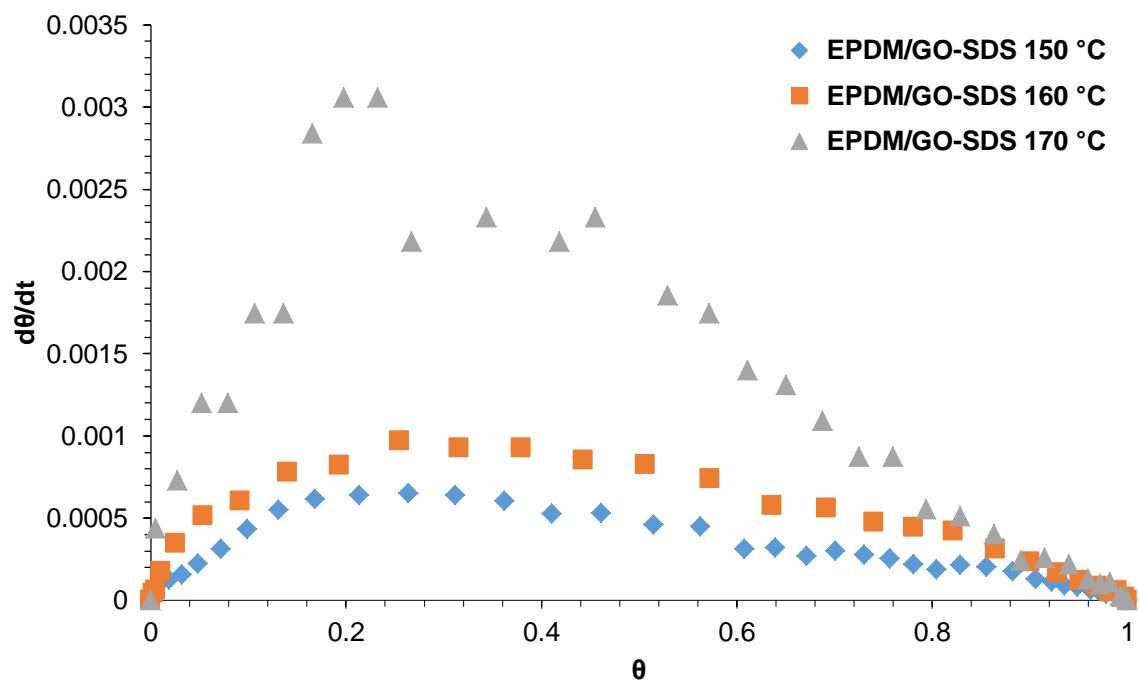

**Figure S3** Reaction rate ( $d\theta/dt$ ) as a function of reaction degree ( $\theta$ ) curves of EPDM/3phr GO-SDS at different vulcanization temperatures

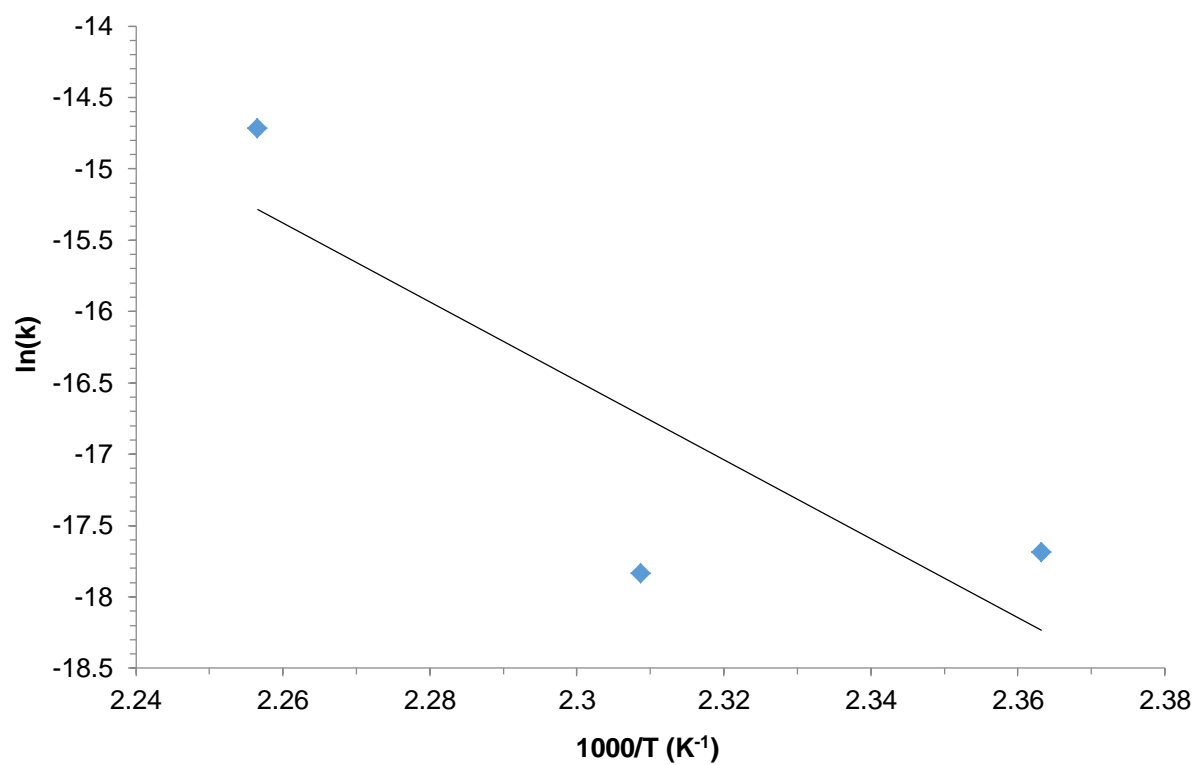

**Figure S4** Arrhenius plot of rate constants of Isayev-Deng model  $n$ th order reaction
